# Supplementary material for: Comparative Transcriptome Analysis Provides Insights into the Resistance in Pueraria [Pueraria lobata (Willd.) Ohwi] in Response to Pseudo-Rust Disease
Source: MDPI journal article supplement (doi:10.3390/ijms23095223), 2022-05-07
Supplement: s1 [file s1]

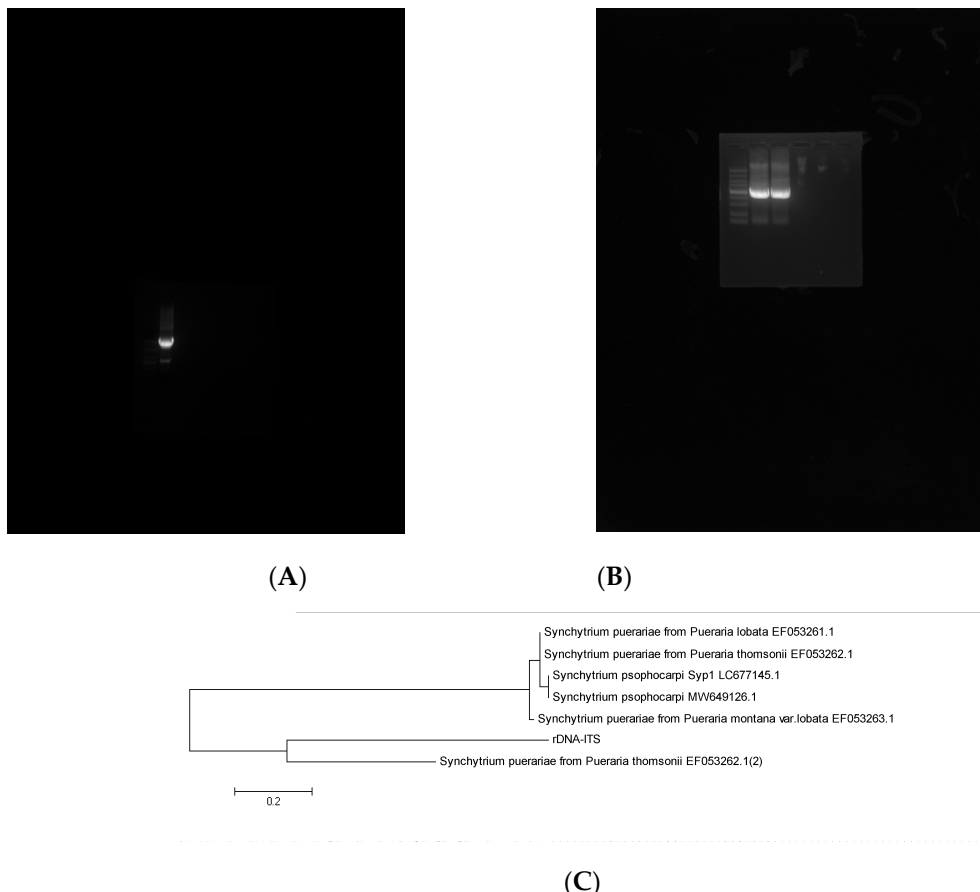

**Figure S1.** (A): Gel analysis on pathogen DNA extraction; 1: DNA extraction product of SpM pathogen; (B): Gel analysis on PCR amplification; 1: PCR amplification product of SpM pathogen DNA; M: DL5000 marker; (C): Verification results of SpM pathogen.

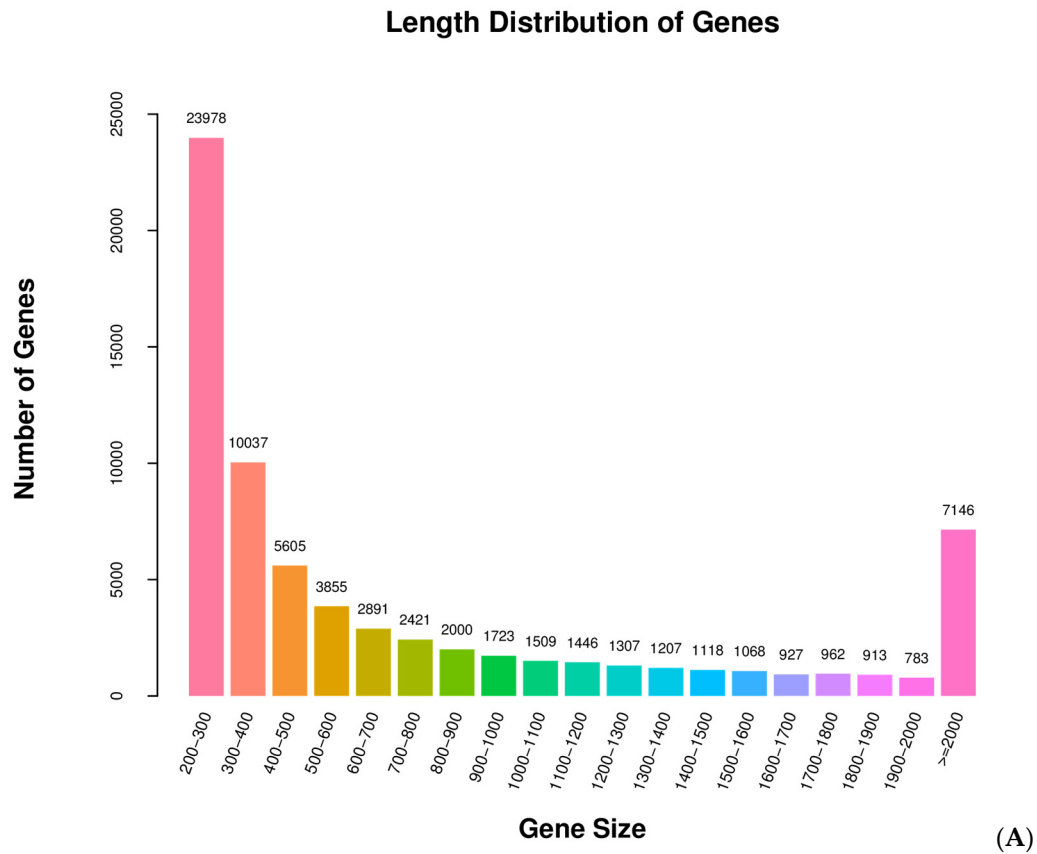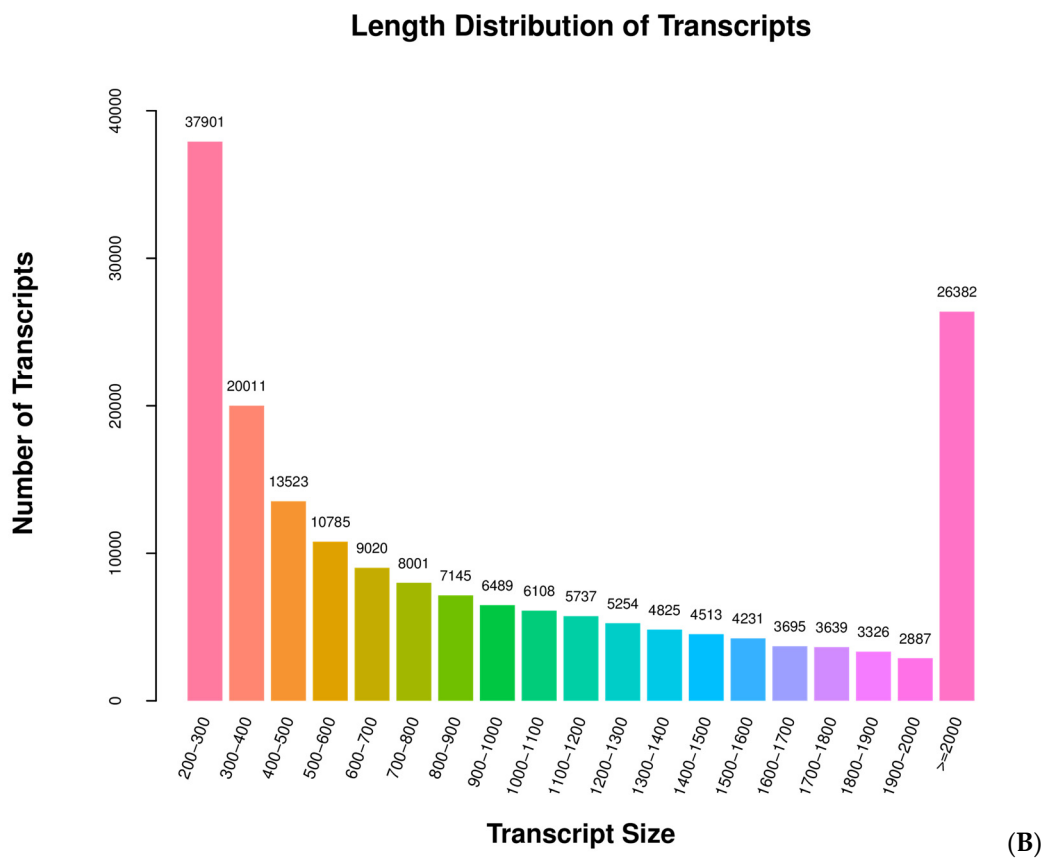

**Figure S2. (A) Length Distribution of Gens; (B) Length Distribution of Transcripts.**

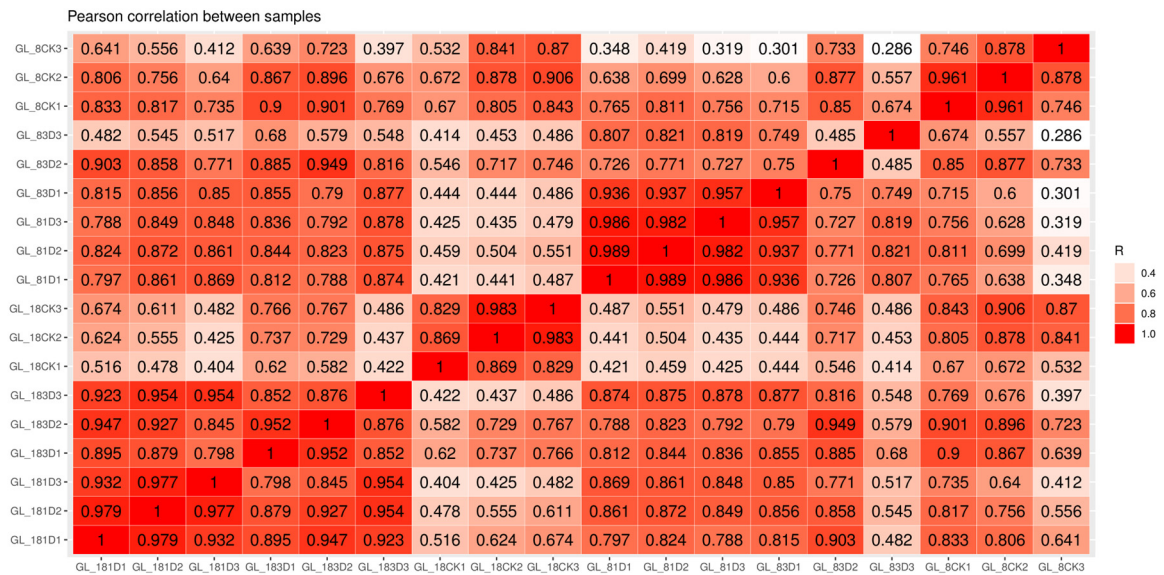

Figure S3. Pearson Correlation between Samples.

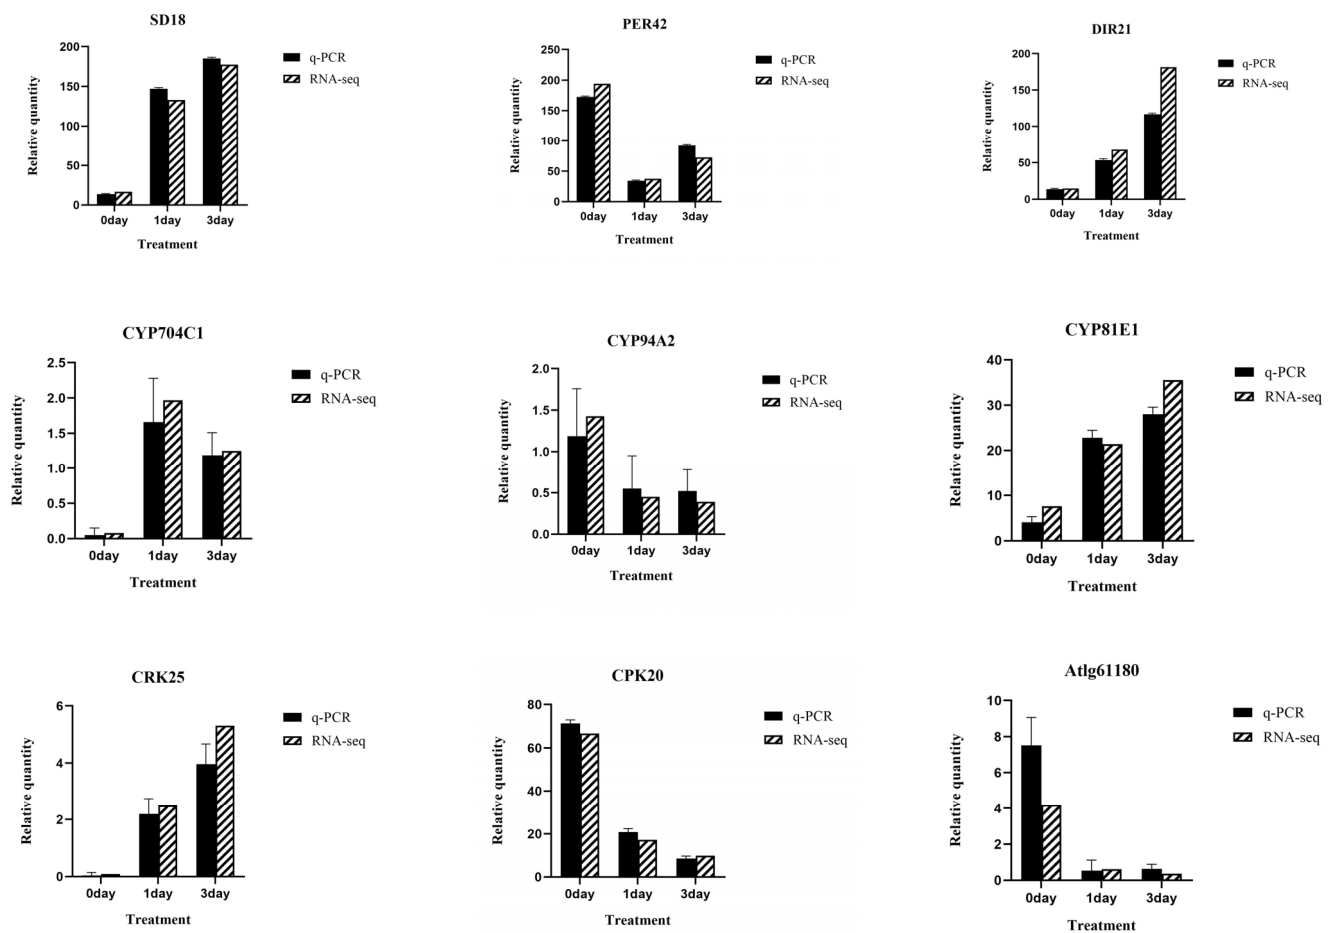

Figure S4. The analysis of the expression levels of the nine unigenes between the q-PCR and RNA-seq.

**Supplementary Table S1.**Quality statistics of transcriptome sequencing after filtering.

| Sample   | Raw reads  | Clean reads | Clean<br>reads<br>ratio/% | Q20<br>ratio/% | Q30<br>ratio% | GC<br>ratio% |
|----------|------------|-------------|---------------------------|----------------|---------------|--------------|
| GL_181D1 | 50,857,956 | 48,560,756  | 95.48                     | 98.49          | 94.97         | 46.11        |
| GL_181D2 | 46,251,570 | 43,374,130  | 93.78                     | 98.59          | 95.20         | 45.91        |
| GL_181D3 | 47,639,518 | 45,307,178  | 95.10                     | 98.56          | 95.12         | 45.56        |
| GL_183D1 | 36,838,316 | 33,488,514  | 90.91                     | 98.59          | 95.22         | 46.03        |
| GL_183D2 | 47,537,152 | 43,101,554  | 90.67                     | 98.61          | 95.27         | 46.87        |
| GL_183D3 | 37,285,532 | 35,638,936  | 95.58                     | 98.67          | 95.43         | 45.98        |
| GL_18CK1 | 39,286,022 | 31,531,224  | 80.26                     | 98.60          | 95.27         | 45.58        |
| GL_18CK2 | 40,095,814 | 34,673,632  | 86.48                     | 98.55          | 95.13         | 45.68        |
| GL_18CK3 | 38,000,458 | 28,712,176  | 75.56                     | 98.54          | 95.12         | 45.53        |
| GL_81D1  | 47,179,536 | 44,539,400  | 94.40                     | 98.58          | 95.18         | 45.10        |
| GL_81D2  | 46477516   | 43,986,328  | 94.64                     | 98.51          | 95.00         | 45.08        |
| GL_81D3  | 34,237,314 | 32,805,196  | 95.82                     | 98.57          | 95.15         | 45.03        |
| GL_83D1  | 45,219,580 | 42,858,066  | 94.78                     | 98.55          | 95.14         | 45.44        |
| GL_83D2  | 34,559,698 | 32,980,312  | 95.43                     | 98.61          | 95.25         | 46.13        |
| GL_83D3  | 45,889,650 | 42,035,796  | 91.60                     | 98.47          | 94.93         | 44.69        |
| GL_8CK1  | 43,006,176 | 40,583,826  | 94.37                     | 98.47          | 94.90         | 45.55        |
| GL_8CK2  | 38,947,166 | 33,551,570  | 86.15                     | 98.57          | 95.23         | 45.98        |
| GL_8CK3  | 56,103,522 | 55,649,222  | 99.19                     | 98.46          | 94.98         | 46.27        |

**Supplementary Table S2.**Primers for real-time quantative PCR.

| Gene      | Foward primer(5'→3')    | Reverse primer(5'→3') |
|-----------|-------------------------|-----------------------|
| Actin     | TCACCAGAATCAAGCACAATACC | TGCCCCCTGAAGAACACCCT  |
| CYP81E1   | CTCAACCCAACGCATCCA      | CCCCGACAGCATCCTCAT    |
| CYP704C1  | GGAAAAATCAATAGGGGACC    | AGCCAGTAGCCGAAAAGT    |
| DIR21     | TTGGTGGAACAGGTGCTT      | GCCCTCGTGAGATGAATA    |
| CRK25     | GTAACAAAACCTTCGCAGTC    | GGTGGCGTTGGAAGATAG    |
| SD18      | GATGACATTGATTTACCGAC    | ACACTTCTCCAAAGCCAC    |
| CYP94A2   | CTCCCAAAGCATACCCTA      | TTGAGAATGTGCTGGACC    |
| PER42     | CTGAAGAAGTGCCCTGAT      | TGTCCAATATGTTCTGTAGTA |
| CPK20     | TCCTCTTTCGTTTCCGTC      | ACCCTCCTCACCCTCCT     |
| Atlg61180 | AAGAACACGCTTGTAATCC     | CTCACCCCTTTTGTGCGTA   |
